# Supplementary material for: Influenza A(H5N6) Virus Reassortant, Southern China, 2014
Source: PubMed Central journal article supplement (PMC4480375; doi:10.3201/eid2107.140838), 2015-07

# Influenza A(H5N6) Virus Reassortant, Southern China, 2014

## Technical Appendix

**Technical Appendix Figure** (following pages). Phylogenetic relationship of genes of A/duck/Guangdong/GD01/2014 (H5N6), a novel virus isolated from ducks in Guangdong Province in southern China during March 2014, compared with reference strains from GenBank. Phylogenetic relationship of specific genes are shown by panel: A) HA, hemagglutinin; B) NA, neuraminidase; C) PB2, polybasic protein 2; D) PB1, polybasic protein 1; E) PA, polymerase acidic protein; F) NP, nucleocapsid protein; G) M, matrix protein; H) NS, nonstructural protein. Triangles indicate the virus characterized in this study. Circles indicate other H5N6 viruses available in GenBank. The tree was constructed by using the neighbor-joining method of MEGA5.05 ([www.megasoftware.net/](http://www.megasoftware.net/)) with 1,000 bootstrap replicates.

# A(HA)

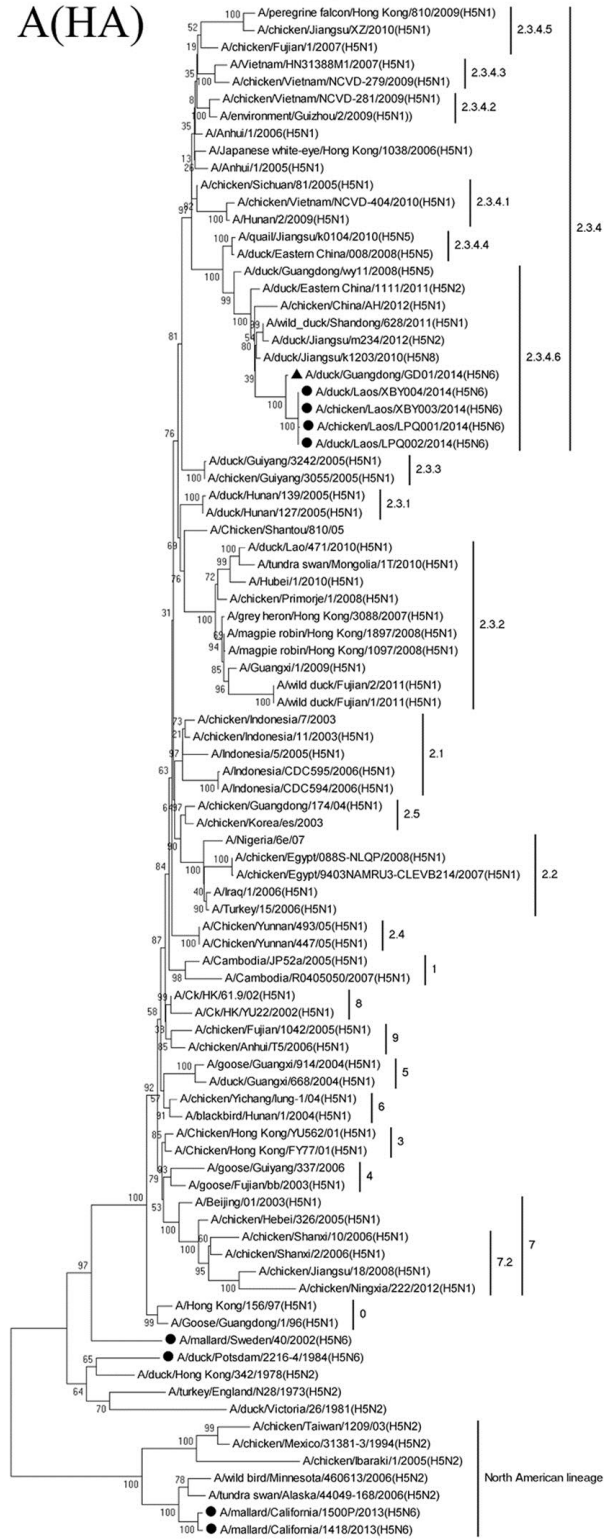

# B(NA)

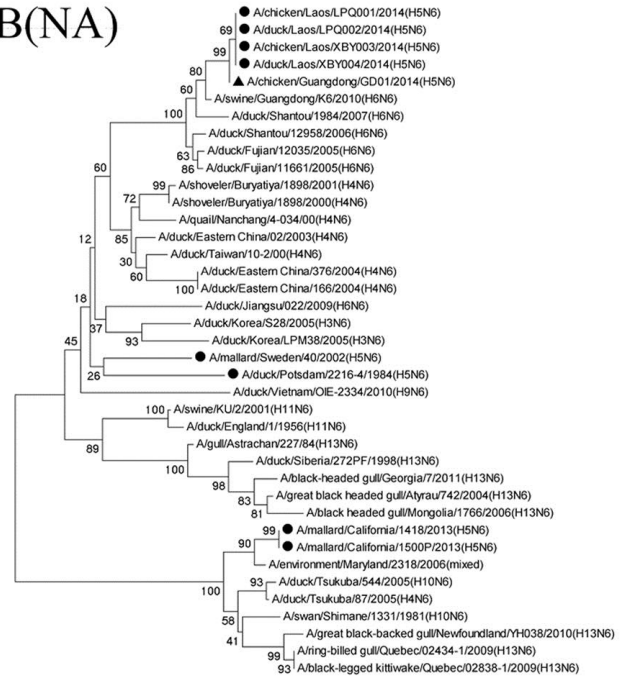

### C(PB2)

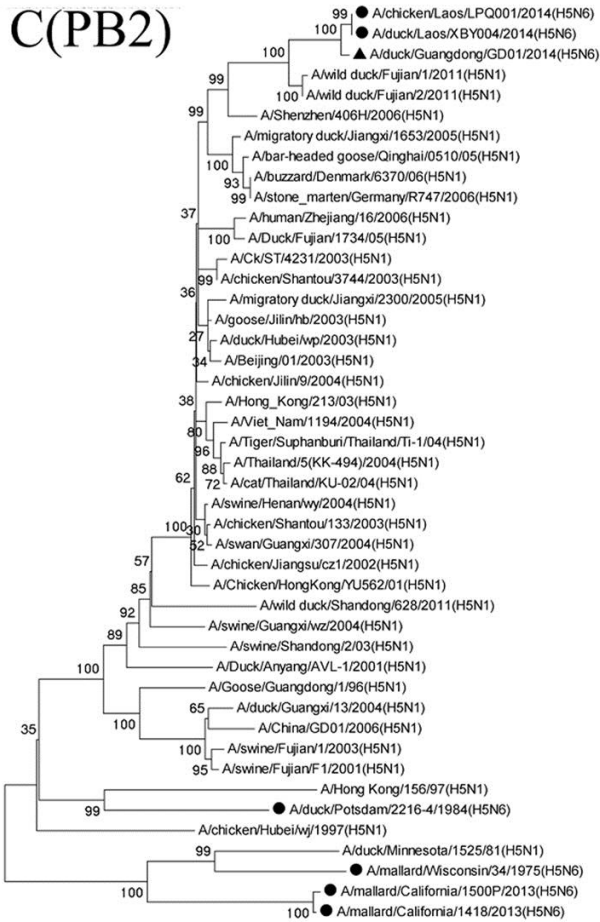

### D(PB1)

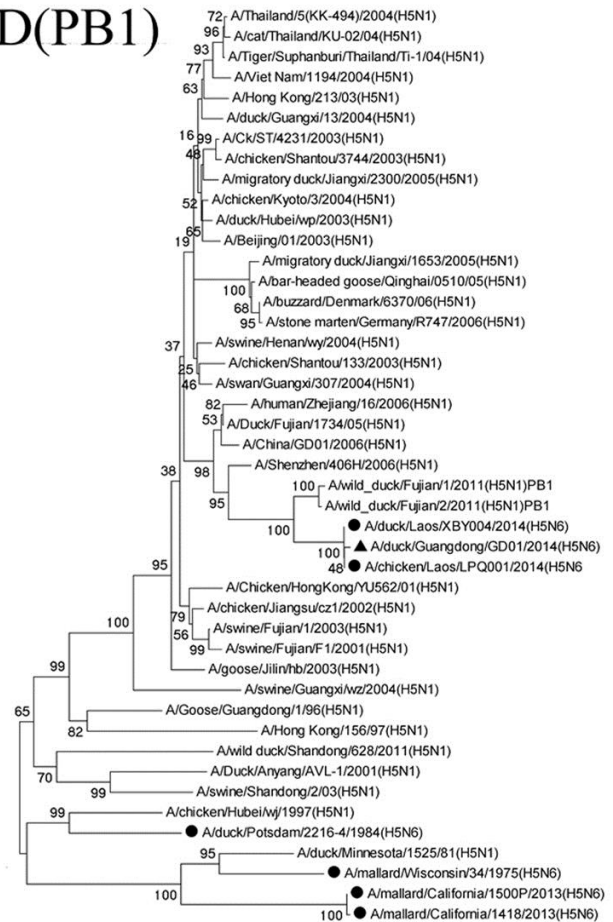

# E(PA)

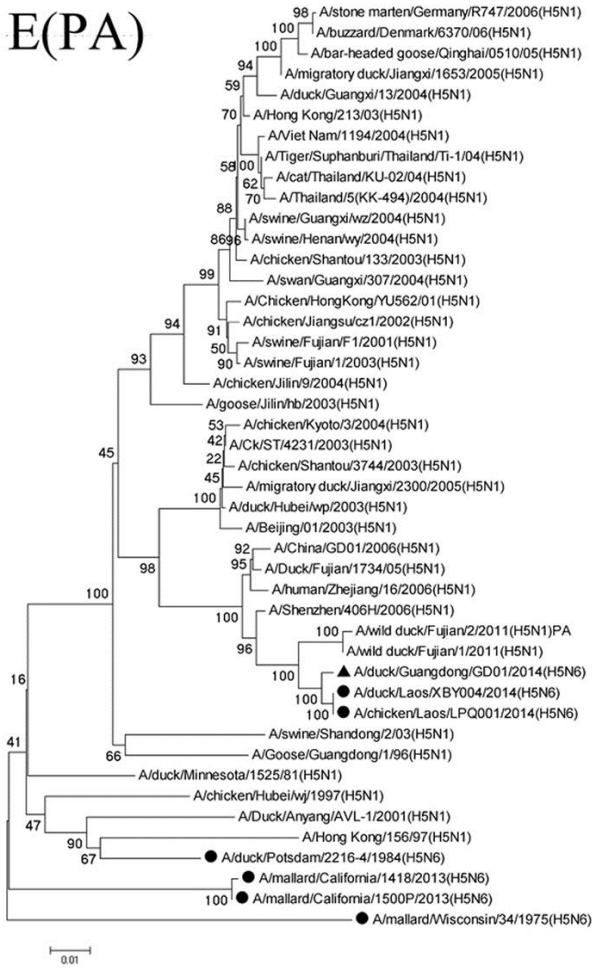

# F(NP)

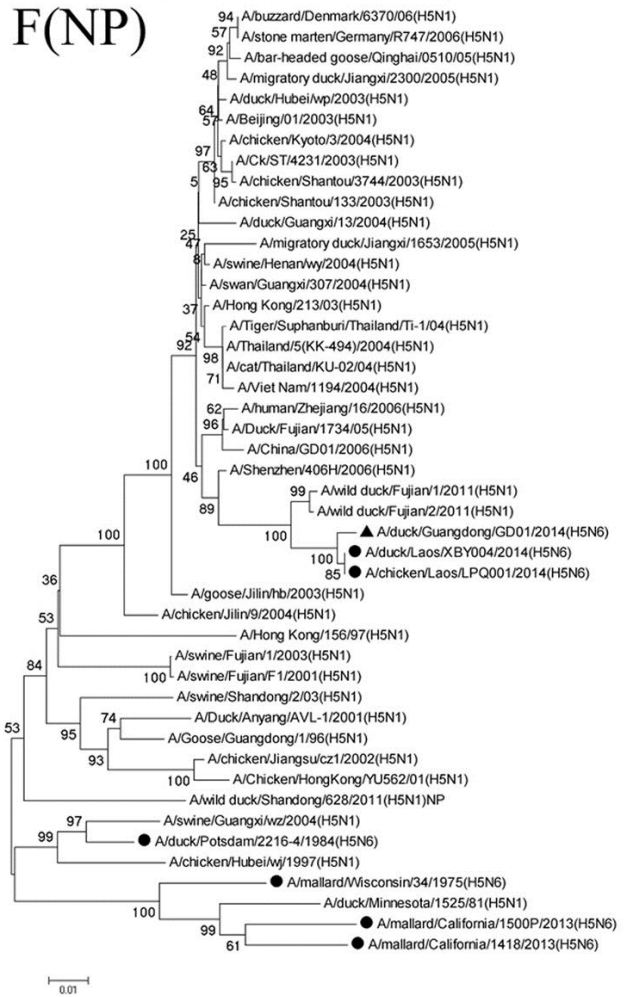

# G(M)

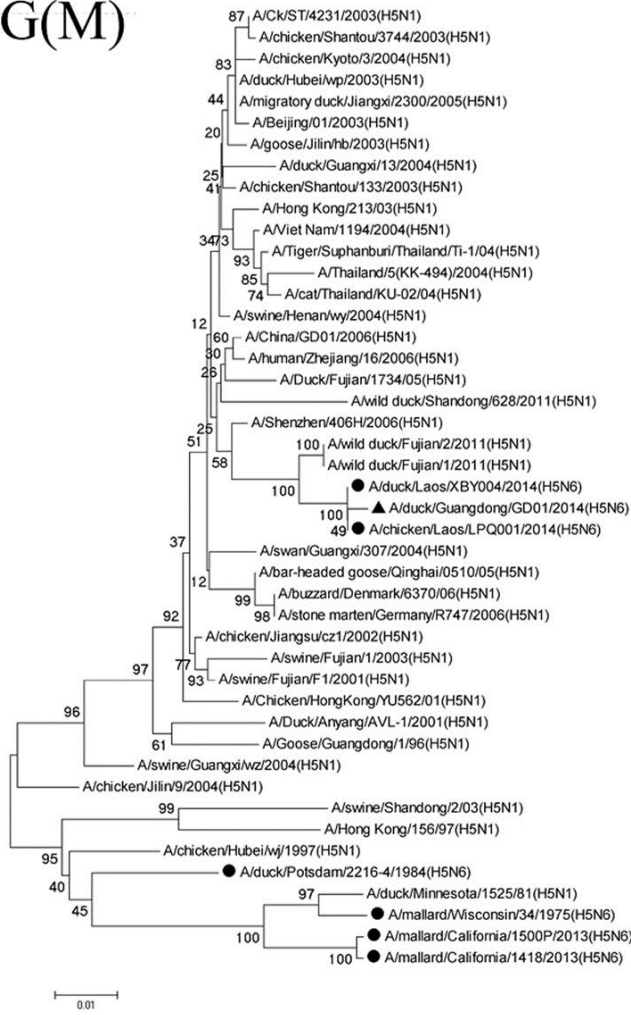

# H(NS)

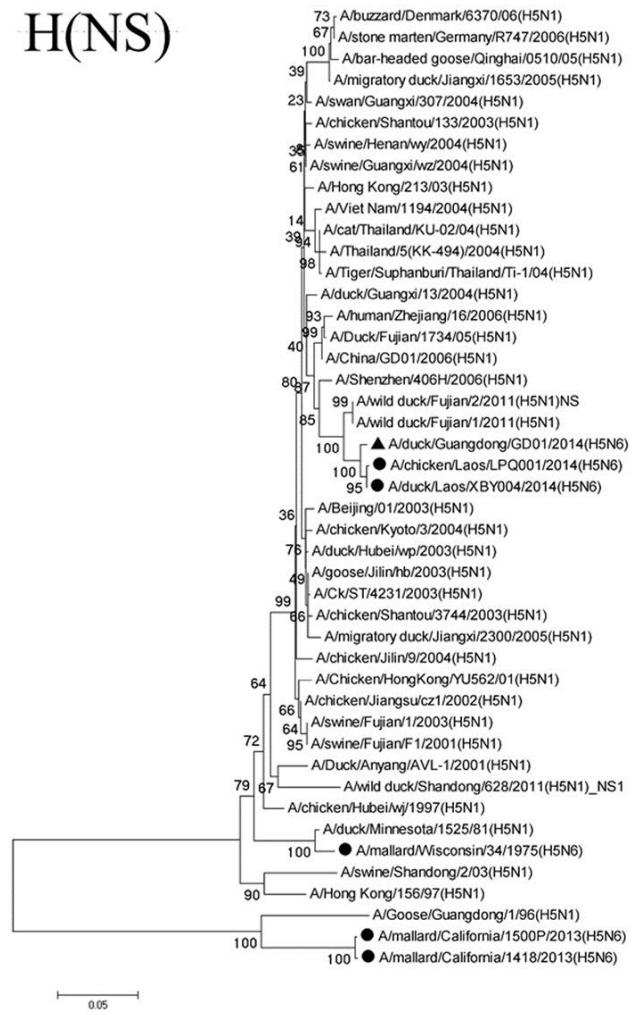

Supplement: 14-0838-Techapp-s1.pdf [file 14-0838-Techapp-s1.pdf]
